# Supplementary material for: Interactive metagenomic visualization in a Web browser
Source: Springer Nature journal article supplement (doi:10.1186/1471-2105-12-385), 2011-09-30

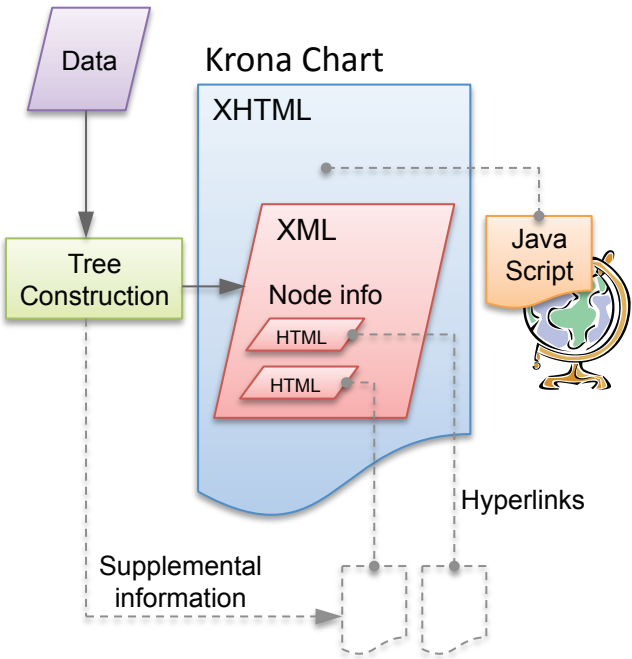

Supplement: 12859_2011_4834_MOESM1_ESM.pdf [file 12859_2011_4834_MOESM1_ESM.pdf]
